# Supplementary material
Source: PubMed Central journal article supplement (PMC6920527)
Supplement: NIHMS1540772-supplement-1.pdf [file NIHMS1540772-supplement-1.pdf]

| Subject ID | Group | Reaction Time (ms) |       | Accuracy (%) |       |
|------------|-------|--------------------|-------|--------------|-------|
|            |       | Con                | Incon | Con          | Incon |
| S1         | CP    | 1106               | 1216  | 95           | 56    |
| S2         | CP    | 1659               | 1789  | 82           | 76    |
| S3         | CP    | 976                | 1010  | 100          | 98    |
| S4         | CP    | 539                | 645   | 100          | 100   |
| S5         | CP    | 942                | 988   | 100          | 99    |
| S6         | CP    | 889                | 1081  | 85           | 73    |
| S7         | CP    | 1391               | 1415  | 87           | 48    |
| S8         | CP    | 903                | 868   | 92           | 91    |
| S9         | CP    | 808                | 941   | 98           | 97    |
| S10        | CP    | 1102               | 1050  | 91           | 90    |
| S11        | CP    | 775                | 809   | 96           | 98    |
| S12        | CP    | 867                | 935   | 99           | 93    |
| S13        | TD    | 723                | 733   | 92           | 94    |
| S14        | TD    | 771                | 813   | 100          | 99    |
| S15        | TD    | 860                | 960   | 99           | 98    |
| S16        | TD    | 600                | 612   | 100          | 100   |
| S17        | TD    | 578                | 636   | 100          | 99    |
| S18        | TD    | 857                | 903   | 100          | 97    |
| S19        | TD    | 733                | 782   | 100          | 98    |
| S20        | TD    | 878                | 871   | 97           | 98    |
| S21        | TD    | 693                | 764   | 100          | 99    |
| S22        | TD    | 618                | 703   | 98           | 96    |
| S23        | TD    | 584                | 634   | 100          | 100   |
| S24        | TD    | 473                | 576   | 100          | 99    |
| S25        | TD    | 442                | 478   | 100          | 100   |
| S26        | TD    | 949                | 924   | 97           | 97    |
| S27        | TD    | 453                | 786   | 100          | 100   |
| S28        | TD    | 654                | 689   | 100          | 100   |
| S29        | TD    | 667                | 765   | 98           | 100   |
| S30        | TD    | 633                | 690   | 99           | 99    |
| S31        | TD    | 598                | 647   | 99           | 100   |
| S32        | TD    | 696                | 731   | 100          | 100   |
| S33        | TD    | 723                | 737   | 99           | 98    |
| S34        | TD    | 654                | 783   | 97           | 97    |
| S35        | TD    | 527                | 537   | 100          | 99    |
| S36        | TD    | 552                | 566   | 100          | 98    |
| S37        | TD    | 700                | 741   | 99           | 97    |
| S38        | TD    | 717                | 749   | 98           | 96    |

**Supplemental Table 1:** Individual reaction time and accuracy results. Abbreviations:  
Con = Congruent condition; Incon= Incongruent condition;
